# Supplementary material for: Endoplasmic Reticulum Stress in Heat- and Shake-Induced Injury in the Rat Small Intestine
Source: PLoS One. 2015 Dec 4;10(12):e0143922. doi: 10.1371/journal.pone.0143922 (PMC4670120; doi:10.1371/journal.pone.0143922)
Supplement: S3 Dataset — (XLSX) [file pone.0143922.s003.xlsx]

## Sheet: Sheet1
Q-PCR
Ct	Acting	Zbtb16	Dap	Herpud1	Mtor	lcn2	Atf6	Casp9	Casp12	Casp8	Atf4
C-1	17.23	20.34	22	22.8	18.47	21.73	18.07	20.33	22.21	17.89	18.81
C-2	17.28	20.47	21.93	22.86	18.55	21.77	18.2	20.28	22.36	17.78	18.78
C-3	17.31	20.41	22.07	22.86	18.63	21.88	18.1	20.25	22.17	17.96	18.86
S3D-1	18.04	19.11	21.63	24.63	20.76	20.51	17.06	20.62	22.32	18.28	19.08
S3D-2	18.11	19.19	21.67	24.4	21.02	20.16	17.52	20.61	22.41	18.23	18.93
S3D-3	18.01	19.06	21.61	24.56	20.84	20.01	17.01	20.53	22.4	18.34	18.97
ΔCt		Zbtb16	Dap	Herpud1	Mtor	lcn2	Atf6	Casp9	Casp12	Casp8	Atf4
C-1		3.11	4.77	5.57	1.24	4.5	0.84	3.1	4.98	0.66	1.58
C-2		3.19	4.65	5.58	1.27	4.49	0.92	3	5.08	0.5	1.5
C-3		3.1	4.76	5.55	1.32	4.57	0.79	2.94	4.86	0.65	1.55
S3D-1		1.07	3.59	6.59	2.72	2.47	-0.98	2.58	4.28	0.24	1.04
S3D-2		1.08	3.56	6.29	2.91	2.05	-0.59	2.5	4.3	0.12	0.82
S3D-3		1.05	3.6	6.55	2.83	2	-1	2.52	4.39	0.33	0.96
		Zbtb16	Dap	Herpud1	Mtor	lcn2	Atf6	Casp9	Casp12	Casp8	Atf4
Average Control		3.13333	4.72667	5.56667	1.27667	4.52	0.85	3.01333	4.97333	0.603333	1.54333
2-ΔΔCt		Zbtb16	Dap	Herpud1	Mtor	lcn2	Atf6	Casp9	Casp12	Casp8	Atf4
S3D-1		4.17951	2.19872	0.491978	0.367717	4.14106	3.55537	1.35035	1.61702	1.28639	1.41748
S3D-2		4.15064	2.24492	0.605696	0.322343	5.54044	2.71321	1.42734	1.59475	1.39797	1.65099
S3D-3		4.23785	2.18354	0.50581	0.340722	5.73582	3.605	1.40769	1.49831	1.2086	1.49831
Average	Zbtb16	Dap	Herpud1	Mtor	lcn2	Atf6	Casp9	Casp12	Casp8	Atf4
C	1	1	1	1	1	1	1	1	1	1
S3D	4.18933	2.20906	-1.87093	-2.91041	5.13911	3.29119	1.39513	1.57003	1.29765	1.52226
StDev S3D	0.0444292	0.0319727	0.062049	0.022823	0.869837	0.501165	0.0400053	0.0630993	0.0951872	0.118582
